# Supplementary material for: Transcriptomic and Network Meta-Analysis of Frontotemporal Dementias
Source: Front Mol Neurosci. 2021 Oct 15;14:747798. doi: 10.3389/fnmol.2021.747798 (PMC8554122; doi:10.3389/fnmol.2021.747798)
Supplement: Supplementary Table 6 — Chemical analysis. [file Table_6.xlsx]

## Sheet: Sheet1
Table S6: Protein-chemical interactions analysis
Familial FTD				Sporadic FTD
Label	Degree	Betweenness		Label	Degree	Betweenness
Valproic Acid	40	7487.49		Valproic Acid	44	12416.4
Copper Sulfate	29	4579.83		Aflatoxin B1	36	8213.93
Aflatoxin B1	29	3211.8		(6-(4-(2-piperidin-1-ylethoxy)phenyl))-3-pyridin-4-ylpyrazolo(1,5-a)pyrimidine	35	8359.27
4-(5-benzo(1,3)dioxol-5-yl-4-pyridin-2-yl-1H-imidazol-2-yl)benzamide	23	3332.83		4-(5-benzo(1,3)dioxol-5-yl-4-pyridin-2-yl-1H-imidazol-2-yl)benzamide	35	8049.82
Cyclosporine	23	1720.16		Cyclosporine	30	4227.33
(6-(4-(2-piperidin-1-ylethoxy)phenyl))-3-pyridin-4-ylpyrazolo(1,5-a)pyrimidine	22	3126.87		Estradiol	29	7673.53
trichostatin A	19	2076.58		(+)-JQ1 compound	26	4808
Antirheumatic Agents	19	1987.08		Antirheumatic Agents	25	4334.42
Benzo(a)pyrene	19	1302.16		Silicon Dioxide	25	3433.65
cobaltous chloride	18	2493.19		Copper Sulfate	25	2961.58		Shared chemical
7,8-Dihydro-7,8-dihydroxybenzo(a)pyrene 9,10-oxide	18	1555.57		Plant Extracts	24	5006.23		Valproic Acid
butyraldehyde	18	1114.48		Acetaminophen	24	3218.77		Copper Sulfate
Acetaminophen	18	1078.31		trichostatin A	23	1937.17		Aflatoxin B1
Tretinoin	17	2284.7		Tretinoin	22	1556.13		4-(5-benzo(1,3)dioxol-5-yl-4-pyridin-2-yl-1H-imidazol-2-yl)benzamide
Methyl Methanesulfonate	15	1198		butyraldehyde	21	3288.51		Cyclosporine
Nickel	15	1134.73		Nickel	21	2432.07		(6-(4-(2-piperidin-1-ylethoxy)phenyl))-3-pyridin-4-ylpyrazolo(1,5-a)pyrimidine
(+)-JQ1 compound	15	987.24		Benzo(a)pyrene	20	2427.1		trichostatin A
Estradiol	14	1588.31		potassium chromate(VI)	20	1216.68		Antirheumatic Agents
arsenic trioxide	14	1053.75		Tetrachlorodibenzodioxin	19	4268.42		Benzo(a)pyrene
Vitamin E	14	749.63		cobaltous chloride	19	2304.19		cobaltous chloride
Silicon Dioxide	13	1263.08		sodium arsenite	18	3560.41		7,8-Dihydro-7,8-dihydroxybenzo(a)pyrene 9,10-oxide
vorinostat	13	721.77		Calcitriol	18	2305.35		butyraldehyde
Quercetin	12	1469.84		vorinostat	17	3160.79		Acetaminophen
Phenylmercuric Acetate	12	986.97		7,8-Dihydro-7,8-dihydroxybenzo(a)pyrene 9,10-oxide	17	747.44		Tretinoin
Selenium	12	635.69		arsenic trioxide	16	2428.1		Methyl Methanesulfonate
Formaldehyde	12	561.08		ICG 001	16	945.58		Nickel
ICG 001	12	482.39		bisphenol A	15	2181.83		(+)-JQ1 compound
Plant Extracts	12	377.46		Arsenic	15	2090.79		Estradiol
Arsenic	11	955.75		Progesterone	15	1500.09		arsenic trioxide
Cisplatin	11	524.28		Genistein	15	931.47		Vitamin E
Coumestrol	11	306.22		C646 compound	15	810.94		Silicon Dioxide
Atrazine	11	233.98		Phenylmercuric Acetate	14	751.64		vorinostat
Progesterone	10	1013.69		Carbamazepine	13	1818.04		Quercetin
Tetrachlorodibenzodioxin	10	699.53		Methyl Methanesulfonate	13	899.71		Phenylmercuric Acetate
decitabine	10	690.62		Diazinon	13	783.12		Selenium
K 7174	10	370.31		Cisplatin	12	1628.63		Formaldehyde
bisphenol A	10	363.02		Quercetin	12	1191.78		ICG 001
C646 compound	10	306.09		Atrazine	12	833.83		Plant Extracts
arsenite	9	537.67		Coumestrol	12	470.43		Arsenic
Hydrogen Peroxide	9	259.01		entinostat	11	808.84		Cisplatin
Dexamethasone	8	506.15		Cadmium	11	801.58		Coumestrol
Ethyl Methanesulfonate	8	453.6		pentanal	11	571.51		Atrazine
propionaldehyde	8	353.98		Methotrexate	10	1190.79		Progesterone
Calcitriol	8	308.97		Hydrogen Peroxide	10	1095.81		Tetrachlorodibenzodioxin
Copper	8	299.99		Zinc	10	1089.23		decitabine
Potassium Dichromate	8	201.22		Copper	10	732.78		K 7174
testosterone enanthate	8	169.57		propionaldehyde	10	663.22		bisphenol A
Cadmium	7	673.73		epigallocatechin gallate	10	632.92		C646 compound
resveratrol	7	571.26		Selenium	10	588.77		arsenite
Methotrexate	7	282.29		tert-Butylhydroperoxide	10	561.36		Hydrogen Peroxide
Vitamin K 3	7	139.59		Vitamin E	10	458.75		Dexamethasone
Cadmium Chloride	7	108.18		Formaldehyde	10	413.79		Ethyl Methanesulfonate
Thimerosal	7	102.86		Cadmium Chloride	9	1039.04		propionaldehyde
methylmercuric chloride	7	75.84		Fluorouracil	9	686.12		Calcitriol
panobinostat	7	63.02		Ethyl Methanesulfonate	9	581.88		Copper
potassium chromate(VI)	6	320.88		beta-methylcholine	9	432.28		Potassium Dichromate
Drugs, Chinese Herbal	6	308.62		resveratrol	8	835.52		testosterone enanthate
Oxygen	6	184.46		decitabine	8	661.76		Cadmium
Vincristine	6	180.7		zoledronic acid	8	337.23		resveratrol
tert-Butylhydroperoxide	6	163.26		NSC 689534	8	237.1		Methotrexate
NSC 689534	6	162		Enzyme Inhibitors	8	212.03		Vitamin K 3
Enzyme Inhibitors	6	121.63		Lead	8	196.35		Cadmium Chloride
beta-methylcholine	6	70.74		nickel sulfate	8	190.31		Thimerosal
Sodium Selenite	6	60.62		Vitamin K 3	7	495.42		methylmercuric chloride
pentanal	6	32.37		Doxorubicin	7	439.79		panobinostat
monomethylarsonous acid	5	455.52		Sodium Selenite	7	270.85		potassium chromate(VI)
sodium arsenite	5	281.68		Isotretinoin	7	254.08		Drugs, Chinese Herbal
nickel sulfate	5	94.54		methylmercuric chloride	7	210.62		Oxygen
Tunicamycin	5	49.32		Asbestos, Crocidolite	7	199.68		Vincristine
2,3-bis(3'-hydroxybenzyl)butyrolactone	5	34.47		pirinixic acid	7	145.62		tert-Butylhydroperoxide
4-hydroxy-2-nonenal	4	208.4		testosterone enanthate	7	140.87		NSC 689534
Raloxifene Hydrochloride	4	199.3		arsenite	7	114.2		Enzyme Inhibitors
epigallocatechin gallate	4	149.4		2,3-bis(3'-hydroxybenzyl)butyrolactone	7	112.48		beta-methylcholine
geldanamycin	4	133.32		Vanadates	7	109.18		Sodium Selenite
pirinixic acid	4	115.92		p-Chloromercuribenzoic Acid	7	81.19		pentanal
Aspirin	4	110.73		Tamoxifen	6	685.18		monomethylarsonous acid
Benzene	4	89.46		Oxygen	6	445.37		sodium arsenite
Thapsigargin	4	87.57		troglitazone	6	301.48		nickel sulfate
N,N,N',N'-tetrakis(2-pyridylmethyl)ethylenediamine	4	76.13		Dasatinib	6	277.12		Tunicamycin
Naphthoquinones	4	75.92		Raloxifene Hydrochloride	6	244.9		2,3-bis(3'-hydroxybenzyl)butyrolactone
Zinc	4	74.63		8-Bromo Cyclic Adenosine Monophosphate	6	225.75		4-hydroxy-2-nonenal
Air Pollutants	4	71.71		Phenobarbital	6	163.78		Raloxifene Hydrochloride
Vanadates	4	44.96		Testosterone	6	160.89		epigallocatechin gallate
Fluorouracil	4	37.58		Tunicamycin	6	111.09		geldanamycin
entinostat	4	30.62		Dexamethasone	6	94.46		pirinixic acid
tamibarotene	4	27.94		panobinostat	6	60.46		Aspirin
p-Chloromercuribenzoic Acid	4	26.11		Nicotine	5	816.65		Benzene
Aldehydes	4	20.41		monomethylarsonous acid	5	547.7		Thapsigargin
Chromium	3	287.55		Drugs, Chinese Herbal	5	405.09		N,N,N',N'-tetrakis(2-pyridylmethyl)ethylenediamine
Tetradecanoylphorbol Acetate	3	254.37		Benzene	5	147.07		Naphthoquinones
Bortezomib	3	223.56		Air Pollutants	5	87.15		Zinc
Nanotubes, Carbon	3	177		Smoke	5	84		Air Pollutants
Vitallium	3	159.82		Thapsigargin	5	72.07		Vanadates
Smoke	3	125.45		Catechin	5	66.16		Fluorouracil
Catechin	3	116.45		mercuric bromide	5	45.11		entinostat
Testosterone	3	111.39		Carmustine	5	43.96		tamibarotene
Demecolcine	3	99.65		K 7174	5	41.46		p-Chloromercuribenzoic Acid
Metribolone	3	98.21		Diclofenac	4	421.14		Aldehydes
ciglitazone	3	88.94		Particulate Matter	4	233.33		Chromium
sulforafan	3	85.03		geldanamycin	4	123.41		Bortezomib
Melphalan	3	81.72		Sarin	4	107.76		Nanotubes, Carbon
Phenobarbital	3	59.86		Mitoxantrone	4	81.78		Vitallium
chloropicrin	3	52.17		1-nitropyrene	4	71.71		Smoke
Bucladesine	3	51.41		Magnetite Nanoparticles	4	66.41		Catechin
Medroxyprogesterone Acetate	3	51.41		Succimer	4	66.41		Testosterone
Plant Oils	3	49.52		Topotecan	4	50.92		Demecolcine
Isotretinoin	3	36.23		Ethinyl Estradiol	4	48.49		ciglitazone
Genistein	3	35.22		Grape Seed Proanthocyanidins	4	47.85		sulforafan
Carbamazepine	3	32.22		chloropicrin	4	44.69		Phenobarbital
Zinc Sulfate	3	27.68		Vincristine	4	37.51		chloropicrin
2-(1H-indazol-4-yl)-6-(4-methanesulfonylpiperazin-1-ylmethyl)-4-morpholin-4-ylthieno(3,2-d)pyrimidine	3	25.51		Demecolcine	4	35.42		Bucladesine
ON 01910	3	25.39		Disulfiram	4	35.25		Medroxyprogesterone Acetate
Polychlorinated Biphenyls	3	23.54		Potassium Dichromate	4	31.33		Plant Oils
pinosylvin	3	23.02		Fonofos	4	23.02		Isotretinoin
sodium bichromate	3	22.7		Parathion	4	23.02		Genistein
kojic acid	3	21.44		terbufos	4	23.02		Carbamazepine
methylselenic acid	3	19.47		U 0126	3	261.04		Zinc Sulfate
Asbestos, Crocidolite	3	19.36		Rifampin	3	220.76		2-(1H-indazol-4-yl)-6-(4-methanesulfonylpiperazin-1-ylmethyl)-4-morpholin-4-ylthieno(3,2-d)pyrimidine
Air Pollutants, Occupational	3	18.49		Dihydrotestosterone	3	192.49		Polychlorinated Biphenyls
Piroxicam	3	16.69		ponatinib	3	133.41		pinosylvin
Dronabinol	3	16.1		methylselenic acid	3	107.38		methylselenic acid
Arbutin	3	14.57		rosiglitazone	3	104.25		Asbestos, Crocidolite
2,2',4,4'-tetrabromodiphenyl ether	3	12.56		Triiodothyronine	3	102.69		Air Pollutants, Occupational
pentabromodiphenyl ether	3	12.56		tamibarotene	3	83.69		Piroxicam
mercuric bromide	3	10.32		pentabromodiphenyl ether	3	83.6		Dronabinol
3-(4-methylphenylsulfonyl)-2-propenenitrile	2	171.45		Manganese	3	73.61		Arbutin
bicalutamide	2	171.45		Nanotubes, Carbon	3	58.96		2,2',4,4'-tetrabromodiphenyl ether
Dihydrotestosterone	2	171.45		Aldehydes	3	54.8		pentabromodiphenyl ether
Lipopolysaccharides	2	171.45		afimoxifene	3	53.8		mercuric bromide
Ifosfamide	2	97.1		Cocaine	3	45.36		3-(4-methylphenylsulfonyl)-2-propenenitrile
dimethylarsinous acid	2	77.25		Azacitidine	3	44.53		bicalutamide
Doxorubicin	2	61.86		Piroxicam	3	38.07		Dihydrotestosterone
Deferoxamine	2	60.72		Naphthoquinones	3	31.03		Lipopolysaccharides
Bezafibrate	2	52.88		belinostat	3	30		dimethylarsinous acid
troglitazone	2	52.88		Polychlorinated Biphenyls	3	29.2		Doxorubicin
Niclosamide	2	41.65		phenethyl isothiocyanate	3	23.78		Bezafibrate
3,4,5,3',4'-pentachlorobiphenyl	2	31.7		irinotecan	3	22.52		troglitazone
Mifepristone	2	26.99		Lithocholic Acid	3	16.82		3,4,5,3',4'-pentachlorobiphenyl
irinotecan	2	26.54		Hydralazine	3	14.72		Mifepristone
Curcumin	2	21.65		Medroxyprogesterone Acetate	3	10.07		irinotecan
Indomethacin	2	20.89		ciglitazone	3	8.76		Curcumin
Mitoxantrone	2	17.85		Air Pollutants, Occupational	3	6.96		Mitoxantrone
Berberine	2	15.92		Sulindac	2	135.05		rosiglitazone
rosiglitazone	2	14.43		Cacodylic Acid	2	128.99		Lead
Lead	2	12.48		Zinc Sulfate	2	80.31		PCI 5002
PCI 5002	2	11.74		Lithium	2	76.71		Mercury
Mercury	2	11.48		AG 1879	2	74.56		Particulate Matter
Particulate Matter	2	9.99		benzyloxycarbonylleucyl-leucyl-leucine aldehyde	2	74.56		Fonofos
Fonofos	2	9.56		fulvestrant	2	74.56		Parathion
Parathion	2	9.56		Thyroxine	2	74.56		terbufos
terbufos	2	9.56		pyrazolo(3,4-d)pyrimidine	2	69.39		belinostat
belinostat	2	8.77		Bortezomib	2	66.16		MRK 003
MRK 003	2	8.77		oxaliplatin	2	60.85		Disulfiram
Disulfiram	2	8.45		lead acetate	2	57.32		afimoxifene
afimoxifene	2	8.44		ochratoxin A	2	43.9		Estrogens
Estrogens	2	8.44		Thimerosal	2	43.51		Uranium Compounds
Uranium Compounds	2	7.77		Iron	2	40.89		zoledronic acid
Uranium	2	7.77		bicalutamide	2	31.56		Grape Seed Proanthocyanidins
uranyl acetate	2	7.77		manganese chloride	2	28.92		3-(2-hydroxy-4-(2-methylnonan-2-yl)phenyl)cyclohexan-1-ol
zoledronic acid	2	6.45		Sertraline	2	24.33		Dasatinib
Grape Seed Proanthocyanidins	2	5.94		Mitomycin	2	23.69		Hydralazine
3-(2-hydroxy-4-(2-methylnonan-2-yl)phenyl)cyclohexan-1-ol	2	5.68		3-hydroxy-4-prenyl-5-methoxystilbene-2-carboxylic acid	2	22.99		Diazinon
Dasatinib	2	5.35		sulforafan	2	20		Azacitidine
Hydralazine	2	5.11		Vitallium	2	19.23		salinomycin
scriptaid	2	4.3		2,2',4,4'-tetrabromodiphenyl ether	2	17.51		Carmustine
bromovanin	2	4.29		Aspirin	2	16.35		temozolomide
Mercuric Chloride	2	3.39		1-Methyl-4-phenylpyridinium	2	16.13		Tamoxifen
Paclitaxel	2	2.97		2-butenal	2	15.44		1-Methyl-4-phenylpyridinium
periodate-oxidized adenosine	2	2.92		Plant Oils	2	14.96		1-nitropyrene
Diazinon	2	2.63		Dronabinol	2	14.91		(4-amino-1,4-dihydro-3-(2-pyridyl)-5-thioxo-1,2,4-triazole)copper(II)
Azacitidine	2	2.13		Estrogens	2	13.43		4-aminophenylarsenoxide
salinomycin	2	2.08		cupric oxide	2	13.08		8-Bromo Cyclic Adenosine Monophosphate
Carmustine	2	1.92		sulindac sulfide	2	12.76		9,10-dihydro-9,10-dihydroxybenzo(a)pyrene
temozolomide	2	1.92		Vinblastine	2	12.76		Acetylcysteine
Tamoxifen	2	1.31		Endosulfan	2	10.33		Adenosine
1,10-phenanthroline	1	0		Etoposide	2	10.16		alpha-cyano-(3,4-dihydroxy)-N-benzylcinnamide
1,2-bis(2-aminophenoxy)ethane-N,N,N',N'-tetraacetic acid	1	0		quinocetone	2	9.65		Am 580
1,3-bis(4-hydroxyphenyl)-4-methyl-5-(4-(2-piperidinylethoxy)phenol)-1H-pyrazole	1	0		4-aminophenylarsenoxide	2	7.96		benzamide
17-(dimethylaminoethylamino)-17-demethoxygeldanamycin	1	0		Vehicle Emissions	2	7.3		cadmium acetate
1-Methyl-4-phenylpyridinium	1	0		Diethylstilbestrol	2	7.09		calfactant
1-nitropyrene	1	0		Barium	2	6.58		Chondroitin Sulfate Proteoglycans
2,2-(2-chlorophenyl-4'-chlorophenyl)-1,1-dichloroethene	1	0		perfluorooctane sulfonic acid	2	6.37		chromium oxide
2,3-dimethoxy-1,4-naphthoquinone	1	0		1-Methyl-3-isobutylxanthine	2	5.64		chromous chloride
2-amino-1-methyl-6-phenylimidazo(4,5-b)pyridine	1	0		nickel chloride	2	5.59		Clioquinol
2-amino-3,8-dimethylimidazo(4,5-f)quinoxaline	1	0		Dinitrochlorobenzene	2	5.14		cupric oxide
2-Chloroadenosine	1	0		Mustard Gas	2	4.98		Cyclic AMP
2-tert-butylhydroquinone	1	0		Arachidonic Acid	2	3.98		Cycloheximide
2-xylene	1	0		triacsin C	2	3.98		Cyclophosphamide
(4-amino-1,4-dihydro-3-(2-pyridyl)-5-thioxo-1,2,4-triazole)copper(II)	1	0		Folic Acid	2	3.72		Cytarabine
4-aminophenylarsenoxide	1	0		Mifepristone	2	3.59		deoxynivalenol
4-oxoretinoic acid	1	0		Vanadium	2	3.56		Diclofenac
5-(4-methylpiperazin-1-yl)-2-(2'-(3,4-dimethoxyphenyl)-5'-benzimidazolyl)benzimidazole	1	0		Cyclophosphamide	2	3.5		Dietary Carbohydrates
5-(5-(3-chloro-5-ethoxy-4-hydroxybenzylidene)-3-methyl-4-oxothiazolidin-2-ylideneamino)-2-chlorobenzoic acid	1	0		3,4,5,3',4'-pentachlorobiphenyl	2	3.34		Diethylstilbestrol
((5Z)5-(1,3-benzodioxol-5-yl)methylene-2-phenylamino-3,5-dihydro-4H-imidazol-4-one)	1	0		3-(4'-hydroxy-3'-adamantylbiphenyl-4-yl)acrylic acid	2	2.97		Dinitrochlorobenzene
8-Bromo Cyclic Adenosine Monophosphate	1	0		CD 437	2	2.97		Etoposide
9,10-dihydro-2,5-dimethoxyphenanthrene-1,7-diol	1	0		Bucladesine	2	2.86		Eugenol
9,10-dihydro-9,10-dihydroxybenzo(a)pyrene	1	0		Arsenicals	2	2.7		fulvestrant
Acetylcysteine	1	0		Arbutin	2	1.68		gemcitabine
Acetylmuramyl-Alanyl-Isoglutamine	1	0		Flavonoids	2	1.57		Glutathione
Active Hexose Correlated Compound	1	0		Polyphenols	2	1.57		lead acetate
adefovir dipivoxil	1	0		10'(Z),13'(E),15'(E)-heptadecatrienylhydroquinone	1	0		lipopolysaccharide, Escherichia coli O111 B4
Adenosine	1	0		1,3-dipropyl-8-cyclopentylxanthine	1	0		motexafin gadolinium
AGN 194204	1	0		1-(6-((3-methoxyestra-1,3,5(10)-trien-17-yl)amino)hexyl)-1H-pyrrole-2,5-dione	1	0		Mustard Gas
alitretinoin	1	0		16 alpha-ethyl-21-hydroxy-19-nor-4-pregnene-3,20-dione	1	0		nickel chloride
alpha-cyano-(3,4-dihydroxy)-N-benzylcinnamide	1	0		1-cyclopropyl-4-(4-((5-methyl-3-(3-(4-(trifluoromethoxy)phenyl)-1,2,4-oxadiazol-5-yl)-1H-pyrazol-1-yl)methyl)pyridin-2-yl)piperazine	1	0		Nicotine
AM 251	1	0		1-ethyl-2-benzimidazolinone	1	0		NSC668394
Am 580	1	0		1-Methyl-4-phenyl-1,2,3,6-tetrahydropyridine	1	0		o,p'-DDT
Amino Acids, Peptides, and Proteins	1	0		2-(1H-indazol-4-yl)-6-(4-methanesulfonylpiperazin-1-ylmethyl)-4-morpholin-4-ylthieno(3,2-d)pyrimidine	1	0		perfluorooctane sulfonic acid
Ammonia	1	0		2,2',4,6,6'-pentachlorobiphenyl	1	0		Phenytoin
Amphotericin B	1	0		2-(2-amino-3-methoxyphenyl)-4H-1-benzopyran-4-one	1	0		Polycyclic Hydrocarbons, Aromatic
Androstenedione	1	0		2,4,5,2',4',5'-hexachlorobiphenyl	1	0		Puromycin Aminonucleoside
Anisomycin	1	0		2-(4-morpholinyl)-8-phenyl-4H-1-benzopyran-4-one	1	0		pyrazolo(3,4-d)pyrimidine
Arsenates	1	0		3-(2-hydroxy-4-(2-methylnonan-2-yl)phenyl)cyclohexan-1-ol	1	0		quinocetone
arsenic disulfide	1	0		3,4,5,4'-tetramethoxystilbene	1	0		rofecoxib
arsenic trichloride	1	0		3,4-Methylenedioxyamphetamine	1	0		Sarin
Atorvastatin Calcium	1	0		3-(4-methylphenylsulfonyl)-2-propenenitrile	1	0		SB 203580
Auranofin	1	0		3,5-bis(2-fluorobenzylidene)piperidin-4-one	1	0		Silver
baicalein	1	0		3,8-dihydroxy-6H-dibenzo(b,d)pyran-6-one	1	0		sodium arsenate
baicalin	1	0		3'-methoxy-4'-nitroflavone	1	0		Sulindac
bathocuproine sulfonate	1	0		4-(2-aminoethyl)benzenesulfonylfluoride	1	0		testosterone-3-carboxymethyloxime-bovine serum albumin conjugate
BAY 11-7085	1	0		4-(3,5-dimethoxystyryl)phenyl acetate	1	0		Theophylline
benazepril	1	0		4-((3-bromophenyl)amino)-6,7-dimethoxyquinazoline	1	0		Tobacco Smoke Pollution
benzamide	1	0		4-(6-bromo-1,3-benzodioxol-5-yl)-3a,4,5,9b-3H-cyclopenta(c)quinoline	1	0		Topotecan
Bilirubin	1	0		4-acetylantroquinonol B	1	0		torcetrapib
bis(4-hydroxycinnamoyl)methane	1	0		(4-amino-1,4-dihydro-3-(2-pyridyl)-5-thioxo-1,2,4-triazole)copper(II)	1	0		triadimefon
bis(4-hydroxyphenyl)sulfone	1	0		4-amino-5-(4-methylphenyl)-7-(tert-butyl)pyrazolo(3,4-d)pyrimidine	1	0		Triiodothyronine
bis(tri-n-butyltin)oxide	1	0		4-hydroxy-2-nonenal	1	0		U 0126
cadmium acetate	1	0		4-methylene-2-octyl-5-oxofuran-3-carboxylic acid	1	0		vanadyl sulfate
calfactant	1	0		4-(N-methyl-N-nitrosamino)-1-(3-pyridyl)-1-butanone	1	0		Vehicle Emissions
calyculin A	1	0		4-phenylbutyric acid	1	0		Vinblastine
Carbocysteine	1	0		5-(5-amino-3-(4-fluorophenyl)pyrazin-2-yl)-1-isopropylprydine-2(1H)-one	1	0		Vitamin D
Chitosan	1	0		5,6-dichloro-1-ethyl-1,3-dihydro-2H-benzimidazol-2-one	1	0		Zidovudine
chloroacetaldehyde	1	0		5H-benzo(4,5)cyclohepta(1,2-b)pyridin-5-one	1	0		Zinc Acetate
Chondroitin Sulfate Proteoglycans	1	0		5-nitroindazole	1	0
chromium oxide	1	0		6-(4-chlorophenyl)imidazo(2,1-b)(1,3)thiazole-5-carbaldehyde O-(3,4-dichlorobenzyl)oxime	1	0
chromous chloride	1	0		6,7-dichloro-1H-indole-2,3-dione 3-oxime	1	0
cidofovir	1	0		6-deisopropylatrazine	1	0
cinnamic aldehyde	1	0		6-formylindolo(3,2-b)carbazole	1	0
Clioquinol	1	0		6-isopropoxy-9-oxoxanthene-2-carboxylic acid	1	0
Clofibrate	1	0		6-methoxy-3-(4-methylphenyl)coumarin	1	0
Cobalt	1	0		6-methyl-1,3,8-trichlorodibenzofuran	1	0
cobalt sulfate	1	0		9,10-dihydro-9,10-dihydroxybenzo(a)pyrene	1	0
Colforsin	1	0		9-mono-N'-methylnorharman	1	0
cupric oxide	1	0		Acetylcysteine	1	0
curdlan	1	0		Acrolein	1	0
Cyclic AMP	1	0		Adenine	1	0
Cycloheximide	1	0		Adenosine	1	0
Cyclophosphamide	1	0		AH 23848	1	0
cylindrospermopsin	1	0		Albuterol	1	0
Cyproterone Acetate	1	0		allyl isothiocyanate	1	0
Cytarabine	1	0		alpha-cyano-(3,4-dihydroxy)-N-benzylcinnamide	1	0
DDT	1	0		Am 580	1	0
delphinidin	1	0		Amiodarone	1	0
deoxynivalenol	1	0		Amphetamine	1	0
diallyl trisulfide	1	0		amurensin G	1	0
Dichlorodiphenyldichloroethane	1	0		antalarmin	1	0
Dichlorodiphenyl Dichloroethylene	1	0		Apamin	1	0
Dichlororibofuranosylbenzimidazole	1	0		apocarotenal	1	0
Diclofenac	1	0		Apomorphine	1	0
dienogest	1	0		astressin	1	0
Dietary Carbohydrates	1	0		Baclofen	1	0
Diethylstilbestrol	1	0		benzamide	1	0
dimethylthioarsinic acid	1	0		benzamidine	1	0
Dinitrochlorobenzene	1	0		benzyl benzoate	1	0
Egtazic Acid	1	0		benzyl cinnamate	1	0
elesclomol	1	0		beta Carotene	1	0
emulphogene BC 720	1	0		beta-glycerophosphoric acid	1	0
Enalapril	1	0		beta-hexachlorocyclohexane	1	0
epicatechin gallate	1	0		beta-hydroxy simvastatin acid	1	0
ethylbenzene	1	0		Bezafibrate	1	0
Etoposide	1	0		bicuculline methobromide	1	0
Eugenol	1	0		bleomycetin	1	0
Fluorocarbons	1	0		bosutinib	1	0
fulvestrant	1	0		bromacil	1	0
gadodiamide	1	0		butylbenzyl phthalate	1	0
gallocatechol	1	0		Butyric Acid	1	0
gemcitabine	1	0		cadmium acetate	1	0
Gentamicins	1	0		caffeic acid	1	0
Glucose	1	0		Caffeine	1	0
Glutathione	1	0		Calcium Chloride	1	0
glycidamide	1	0		Calcium	1	0
Gold	1	0		calfactant	1	0
Hydrocortisone	1	0		candoxin	1	0
hydroxytamoxifen	1	0		Capsaicin	1	0
Isoproterenol	1	0		CC-8490	1	0
K-12 lipopolysaccharide	1	0		Cerium	1	0
kaempferol 3-O-sophoroside	1	0		CGP 77675	1	0
lead acetate	1	0		Chlorodiphenyl (54% Chlorine)	1	0
lenalidomide	1	0		Chloroform	1	0
Linoleic Acid	1	0		Chlorogenic Acid	1	0
lipid A precursors, bacterial	1	0		Chondroitin Sulfate Proteoglycans	1	0
lipopeptidophosphoglycan	1	0		Chromium Compounds	1	0
lipopolysaccharide, E. coli O26-B6	1	0		Chromium	1	0
lipopolysaccharide, E coli O55-B5	1	0		chromium hexavalent ion	1	0
lipopolysaccharide, Escherichia coli O111 B4	1	0		chromium oxide	1	0
lycopene	1	0		chromous chloride	1	0
Methadone	1	0		Cilomilast	1	0
methoxyacetic acid	1	0		Clioquinol	1	0
Methylene Chloride	1	0		Coal Ash	1	0
Methylnitronitrosoguanidine	1	0		cobaltiprotoporphyrin	1	0
Methylthiouracil	1	0		Colchicine	1	0
MF101 extract	1	0		CPG-oligonucleotide	1	0
Mitotane	1	0		Curcumin	1	0
MitoTEMPO	1	0		cyanazine	1	0
morphine-3-glucuronide	1	0		Cyclic AMP	1	0
Morphine	1	0		Cycloheximide	1	0
motexafin gadolinium	1	0		cyclohexyl-(2-(3,5-dimethylpyrazol-1-yl)-6-methylpyrimidin-4-yl)amine	1	0
Mustard Gas	1	0		Cytarabine	1	0
Naloxone	1	0		Daunorubicin	1	0
Naphthalimides	1	0		decabromobiphenyl ether	1	0
N-butyrylglucosamine	1	0		deguelin	1	0
nickel chloride	1	0		Dehydroepiandrosterone	1	0
Nicotine	1	0		deoxynivalenol	1	0
N-(N-(3,5-difluorophenacetyl)alanyl)phenylglycine tert-butyl ester	1	0		Dibutyl Phthalate	1	0
NSC668394	1	0		Dietary Carbohydrates	1	0
Okadaic Acid	1	0		dihydroartemisinin	1	0
o,p'-DDT	1	0		dimethomorph	1	0
Oxazolone	1	0		dimethylarsinous acid	1	0
Oxyquinoline	1	0		Dimethylnitrosamine	1	0
palbociclib	1	0		Dimethyl Sulfoxide	1	0
PCI 32765	1	0		Dinitrofluorobenzene	1	0
PD 0325901	1	0		dioscin	1	0
perfluorooctane sulfonic acid	1	0		diphenylcyclopropenone	1	0
Phenytoin	1	0		Diquat	1	0
Polycyclic Hydrocarbons, Aromatic	1	0		Dopamine	1	0
Polymyxin B	1	0		Dust	1	0
Promegestone	1	0		(E)-4-((2-N-(4-methoxybenzenesulfonyl)amino)stilbazole)1-oxide	1	0
Proteoglycans	1	0		Ellagic Acid	1	0
Puromycin Aminonucleoside	1	0		Emodin	1	0
pyrazolo(3,4-d)pyrimidine	1	0		Environmental Pollutants	1	0
pyrrolidine dithiocarbamic acid	1	0		Equol	1	0
quinocetone	1	0		Erbium	1	0
Ribomunyl	1	0		Erlotinib Hydrochloride	1	0
rofecoxib	1	0		Eugenol	1	0
Sarin	1	0		Fatty Acids, Omega-3	1	0
SB 203580	1	0		Fatty Acids, Omega-6	1	0
seocalcitol	1	0		Filipin	1	0
Silver	1	0		Flurbiprofen	1	0
Simvastatin	1	0		Gadolinium	1	0
Sirolimus	1	0		Gallic Acid	1	0
sodium arsenate	1	0		garcinol	1	0
Soot	1	0		gedunin	1	0
Staurosporine	1	0		gefitinib	1	0
Streptozocin	1	0		gemcitabine	1	0
Sulindac	1	0		ginsenoside Rg3	1	0
telmisartan	1	0		Glutathione	1	0
testosterone-3-carboxymethyloxime-bovine serum albumin conjugate	1	0		Go 6976	1	0
tetrachloropalladium	1	0		Gossypol	1	0
Thalidomide	1	0		GSK 1363089	1	0
Theophylline	1	0		heliotrine	1	0
Thiosemicarbazones	1	0		Hemin	1	0
Tobacco Smoke Pollution	1	0		Heparin	1	0
Toluene	1	0		Heroin	1	0
Topotecan	1	0		Hexachlorobenzene	1	0
torcetrapib	1	0		Holmium	1	0
trans-10,cis-12-conjugated linoleic acid	1	0		honokiol	1	0
triadimefon	1	0		hydroquinone	1	0
Trichloroethylene	1	0		hydroxyhydroquinone	1	0
Triiodothyronine	1	0		Ibuprofen	1	0
tungsten carbide	1	0		indoleacetaldehyde	1	0
U 0126	1	0		INX 08189	1	0
vanadyl sulfate	1	0		Ketoconazole	1	0
Vehicle Emissions	1	0		L-826,141	1	0
Vinblastine	1	0		Lamivudine	1	0
Vitamin A	1	0		Lanthanum	1	0
Vitamin D	1	0		lazabemide	1	0
wogonoside	1	0		Leukotriene D4	1	0
Zidovudine	1	0		Levamisole	1	0
Zinc Acetate	1	0		lipopolysaccharide, Escherichia coli O111 B4	1	0
Zymosan	1	0		Lipopolysaccharides	1	0
				Lithium Chloride	1	0
				lithocholic acid acetate	1	0
				lonafarnib	1	0
				Lucanthone	1	0
				Mercury	1	0
				Methoxychlor	1	0
				methyl-beta-cyclodextrin	1	0
				Methylcholanthrene	1	0
				Methylene Blue	1	0
				methyllycaconitine	1	0
				Methylphenidate	1	0
				methyl salicylate	1	0
				Mibefradil	1	0
				mithramycin A	1	0
				monomethylarsonic acid	1	0
				motexafin gadolinium	1	0
				MRK 003	1	0
				MT19c compound	1	0
				M-VAC protocol	1	0
				N'-(11H-indolo(3,2-c)quinolin-6-yl)-N,N-dimethylethane-1,2-diamine	1	0
				N-(1-fluoro-3-phenylpropan-2-yl)-N-methylprop-2-yn-1-amine	1	0
				N'-((2-hydroxyphenyl)carbonothioyl)pyridine-2-carbohydrazide	1	0
				N-(2(R)-2-(hydroxamidocarbonylmethyl)-4-methylpentanoyl)-L-tryptophan methylamide	1	0
				N-acetylsphingosine	1	0
				naphtho(1,2-b)furan-4,5-dione	1	0
				N-benzyloxycarbonylprolylprolinal	1	0
				Neodymium	1	0
				N-Formylmethionine Leucyl-Phenylalanine	1	0
				Nitric Oxide	1	0
				N-Methyl-3,4-methylenedioxyamphetamine	1	0
				N,N,N',N'-tetrakis(2-pyridylmethyl)ethylenediamine	1	0
				norharman	1	0
				NSC668394	1	0
				NSC 680410	1	0
				NVP ABE171	1	0
				octa-2,4,6-trienoic acid	1	0
				o,p'-DDT	1	0
				Organometallic Compounds	1	0
				ormosil	1	0
				Ouabain	1	0
				oxidized-L-alpha-1-palmitoyl-2-arachidonoyl-sn-glycero-3-phosphorylcholine	1	0
				oxophenylarsine	1	0
				Ozone	1	0
				Pargyline	1	0
				parthenolide	1	0
				PCI 5002	1	0
				PD 81723	1	0
				perfluorooctanoic acid	1	0
				Phenelzine	1	0
				phenethylamine	1	0
				Phenylpropanolamine	1	0
				Phenytoin	1	0
				pinosylvin	1	0
				pioglitazone	1	0
				PK 11195	1	0
				pluronic block copolymer p85	1	0
				pobilukast	1	0
				Poly(amidoamine)	1	0
				Polycyclic Hydrocarbons, Aromatic	1	0
				Polyethylene Glycols	1	0
				Polyethylene	1	0
				Potassium Iodide	1	0
				prometone	1	0
				propazine	1	0
				Pt(O,O'-acac)(gamma-acac)(DMS)	1	0
				Puromycin Aminonucleoside	1	0
				Pyrazoles	1	0
				Pyrimidines	1	0
				Pyrrolizidine Alkaloids	1	0
				Pyruvaldehyde	1	0
				quinoline	1	0
				rasagiline	1	0
				Reactive Oxygen Species	1	0
				Ritonavir	1	0
				Ro 21-5104	1	0
				rofecoxib	1	0
				Roflumilast	1	0
				Rolipram	1	0
				rosmarinic acid	1	0
				rutecarpine	1	0
				Ruthenium Compounds	1	0
				Ruthenium	1	0
				salinomycin	1	0
				SB 203580	1	0
				SC-203048	1	0
				Scandium	1	0
				Selegiline	1	0
				Selenomethionine	1	0
				senkirkine	1	0
				Serotonin	1	0
				Silver	1	0
				Simazine	1	0
				sodium arsenate	1	0
				sorafenib	1	0
				staurosporine aglycone	1	0
				SU 6656	1	0
				Tacrolimus	1	0
				tanshinone	1	0
				Taurine	1	0
				temozolomide	1	0
				terbacil	1	0
				Terpenes	1	0
				testosterone-3-carboxymethyloxime-bovine serum albumin conjugate	1	0
				tetrahydropalmatine	1	0
				tetraiodothyroacetic acid	1	0
				Thallium	1	0
				theonyltrifluoroacetone	1	0
				Theophylline	1	0
				titanium dioxide	1	0
				Tobacco Smoke Pollution	1	0
				tobacco tar	1	0
				torcetrapib	1	0
				trequinsin	1	0
				triadimefon	1	0
				Triazoles	1	0
				triphenyl(phenylethynyl)phosphonium	1	0
				tripterine	1	0
				Triterpenes	1	0
				tryptamine	1	0
				tyrphostin AG 1478	1	0
				Uranium Compounds	1	0
				vanadyl sulfate	1	0
				Vitamin B 12	1	0
				Vitamin D	1	0
				VUF 5455	1	0
				Weichang'an	1	0
				wortmannin	1	0
				yessotoxin	1	0
				Ytterbium	1	0
				Yttrium	1	0
				Zidovudine	1	0
				Zinc Acetate	1	0
				zinc chloride	1	0
				zinc protoporphyrin	1	0
